# Supplementary material
Source: publisher site journal article supplement (https://www.dovepress.com/article/419481)

Supplementary materials

## Supplementary Table 1. Broad definition for COVID-19 diagnoses

| **Concept ID** | **Concept Code** | **Concept Name** | **Vocabulary** |
| --- | --- | --- | --- |
| 3661405 | 138389411000119105 | Acute bronchitis caused by SARS-CoV-2 | SNOMED |
| 3655976 | 870590002 | Acute hypoxemic respiratory failure due to disease caused by Severe acute respiratory syndrome coronavirus 2 | SNOMED |
| 3661748 | 870589006 | Acute kidney injury due to disease caused by Severe acute respiratory syndrome coronavirus 2 | SNOMED |
| 3661406 | 674814021000119106 | Acute respiratory distress syndrome due to disease caused by Severe acute respiratory syndrome coronavirus 2 | SNOMED |
| 3662381 | 189486241000119100 | Asymptomatic SARS-CoV-2 | SNOMED |
| 756031 | OMOP4873909 | Bronchitis caused by COVID-19 | OMOP Extension |
| 3656667 | 119731000146105 | Cardiomyopathy due to disease caused by Severe acute respiratory syndrome coronavirus 2 | SNOMED |
| 3656668 | 119741000146102 | Conjunctivitis due to disease caused by Severe acute respiratory syndrome coronavirus 2 | SNOMED |
| 439676 | 186747009 | Coronavirus infection | SNOMED |
| 37311061 | 840539006 | COVID-19 | SNOMED |
| 4100065 | 27619001 | Disease due to Coronaviridae | SNOMED |
| 3656669 | 119981000146107 | Dyspnea caused by Severe acute respiratory syndrome coronavirus 2 | SNOMED |
| 37310284 | 1240561000000108 | Encephalopathy due to disease caused by Severe acute respiratory syndrome coronavirus 2 | SNOMED |
| 3661885 | 119751000146104 | Fever caused by Severe acute respiratory syndrome coronavirus 2 | SNOMED |
| 37310283 | 1240571000000101 | Gastroenteritis caused by SARS-CoV-2 (severe acute respiratory syndrome coronavirus 2) | SNOMED |
| 37310286 | 1240541000000107 | Infection of upper respiratory tract caused by Severe acute respiratory syndrome coronavirus 2 | SNOMED |
| 3663281 | 880529761000119102 | Lower respiratory infection caused by SARS-CoV-2 | SNOMED |
| 3661631 | 866151004 | Lymphocytopenia due to Severe acute respiratory syndrome coronavirus 2 | SNOMED |
| 37310287 | 1240531000000103 | Myocarditis due to disease caused by Severe acute respiratory syndrome coronavirus 2 | SNOMED |
| 37310254 | 1240521000000100 | Otitis media due to disease caused by Severe acute respiratory syndrome coronavirus 2 | SNOMED |
| 704995 | OMOP4912977 | Patient meets COVID-19 clinical diagnostic criteria | OMOP Extension |
| 700297 | OMOP4912988 | Patient meets COVID-19 laboratory confirmation criterion (detection of specific RNA in a clinical specimen using a molecular amplification detection test) | OMOP Extension |
| 704996 | OMOP4912978 | Patient meets COVID-19 laboratory diagnostic criteria | OMOP Extension |
| 700296 | OMOP4912987 | Patient meets COVID-19 presumptive laboratory evidence criteria (detection of specific antigen in a clinical specimen, OR detection of specific antibody in serum, plasma, or whole blood indicative of a new or recent infection) | OMOP Extension |
| 37016927 | 713084008 | Pneumonia caused by Human coronavirus | SNOMED |
| 3661408 | 882784691000119100 | Pneumonia caused by SARS-CoV-2 | SNOMED |
| 40479642 | 441590008 | Pneumonia due to Severe acute respiratory syndrome coronavirus | SNOMED |
| 756039 | OMOP4873907 | Respiratory infection caused by COVID-19 | OMOP Extension |
| 3655977 | 870591003 | Rhabdomyolysis due to disease caused by Severe acute respiratory syndrome coronavirus 2 | SNOMED |
| 3655975 | 870588003 | Sepsis due to disease caused by Severe acute respiratory syndrome coronavirus 2 | SNOMED |
| 320651 | 398447004 | Severe acute respiratory syndrome | SNOMED |
| 37396171 | 715882005 | Severe acute respiratory syndrome of upper respiratory tract | SNOMED |
| 37311060 | 840544004 | Suspected COVID-19 | SNOMED |
| 3661632 | 866152006 | Thrombocytopenia due to Severe acute respiratory syndrome coronavirus 2 | SNOMED |
| 45763724 | 700217006 | Suspected coronavirus infection | SNOMED |

##

## Supplementary Table 2. Narrow definition for COVID-19 diagnoses

| **Concept ID** | **Concept Code** | **Concept Name** | **Vocabulary** |
| --- | --- | --- | --- |
| 3661405 | 138389411000119105 | Acute bronchitis caused by SARS-CoV-2 | SNOMED |
| 3655976 | 870590002 | Acute hypoxemic respiratory failure due to disease caused by Severe acute respiratory syndrome coronavirus 2 | SNOMED |
| 3661748 | 870589006 | Acute kidney injury due to disease caused by Severe acute respiratory syndrome coronavirus 2 | SNOMED |
| 3661406 | 674814021000119106 | Acute respiratory distress syndrome due to disease caused by Severe acute respiratory syndrome coronavirus 2 | SNOMED |
| 3662381 | 189486241000119100 | Asymptomatic SARS-CoV-2 | SNOMED |
| 756031 | OMOP4873909 | Bronchitis caused by COVID-19 | OMOP Extension |
| 3656667 | 119731000146105 | Cardiomyopathy due to disease caused by Severe acute respiratory syndrome coronavirus 2 | SNOMED |
| 3656668 | 119741000146102 | Conjunctivitis due to disease caused by Severe acute respiratory syndrome coronavirus 2 | SNOMED |
| 37311061 | 840539006 | COVID-19 | SNOMED |
| 3656669 | 119981000146107 | Dyspnea caused by Severe acute respiratory syndrome coronavirus 2 | SNOMED |
| 37310284 | 1240561000000108 | Encephalopathy due to disease caused by Severe acute respiratory syndrome coronavirus 2 | SNOMED |
| 3661885 | 119751000146104 | Fever caused by Severe acute respiratory syndrome coronavirus 2 | SNOMED |
| 37310283 | 1240571000000101 | Gastroenteritis caused by SARS-CoV-2 (severe acute respiratory syndrome coronavirus 2) | SNOMED |
| 37310286 | 1240541000000107 | Infection of upper respiratory tract caused by Severe acute respiratory syndrome coronavirus 2 | SNOMED |
| 3663281 | 880529761000119102 | Lower respiratory infection caused by SARS-CoV-2 | SNOMED |
| 3661631 | 866151004 | Lymphocytopenia due to Severe acute respiratory syndrome coronavirus 2 | SNOMED |
| 37310287 | 1240531000000103 | Myocarditis due to disease caused by Severe acute respiratory syndrome coronavirus 2 | SNOMED |
| 37310254 | 1240521000000100 | Otitis media due to disease caused by Severe acute respiratory syndrome coronavirus 2 | SNOMED |
| 704995 | OMOP4912977 | Patient meets COVID-19 clinical diagnostic criteria | OMOP Extension |
| 700297 | OMOP4912988 | Patient meets COVID-19 laboratory confirmation criterion (detection of specific RNA in a clinical specimen using a molecular amplification detection test) | OMOP Extension |
| 704996 | OMOP4912978 | Patient meets COVID-19 laboratory diagnostic criteria | OMOP Extension |
| 700296 | OMOP4912987 | Patient meets COVID-19 presumptive laboratory evidence criteria (detection of specific antigen in a clinical specimen, OR detection of specific antibody in serum, plasma, or whole blood indicative of a new or recent infection) | OMOP Extension |
| 3661408 | 882784691000119100 | Pneumonia caused by SARS-CoV-2 | SNOMED |
| 756039 | OMOP4873907 | Respiratory infection caused by COVID-19 | OMOP Extension |
| 3655977 | 870591003 | Rhabdomyolysis due to disease caused by Severe acute respiratory syndrome coronavirus 2 | SNOMED |
| 3655975 | 870588003 | Sepsis due to disease caused by Severe acute respiratory syndrome coronavirus 2 | SNOMED |
| 3661632 | 866152006 | Thrombocytopenia due to Severe acute respiratory syndrome coronavirus 2 | SNOMED |

##

## Supplementary Table 3. Failed data quality checks

| **Check** | **Description** | **Interpretation** |
| --- | --- | --- |
| 1 | The number and percent of records with a value of 0 in the source concept field DRUG_SOURCE_CONCEPT_ID in the DRUG_EXPOSURE table. (Threshold=10% - Records=100%). | Drugs are coming from a national drug vocabulary, so DRUG_SOURCE_CONCEPT_ID has to be 0. |
| 2 | The number and percent of distinct source values in the DRUG_SOURCE_VALUE field of the DRUG_EXPOSURE table mapped to 0. (Threshold=10% - Records=100%). | DRUG_SOURCE_VALUE is set to 0, but stored by the development team to avoid identifying specific products. |
| 3 | The number and percent of records with a value of 0 in the standard concept field UNIT_CONCEPT_ID in the OBSERVATION table. (Threshold=5% - Records=99.93%). | This 99.93% of records have unit_concept_id=0. It must be set to NULL instead of 0. |
| 4 | For the combination of CONCEPT_ID 3017044 (THYROTROPIN RECEPTOR AB [UNITS/VOLUME] IN SERUM) and UNIT_CONCEPT_ID 8923 (INTERNATIONAL UNIT PER LITER), the number and percent of records that have a value less than 0.00E+00. (Threshold=5% - Records=51.40%). | This measurement has not been used in any OMOP-SIDIAP project before. Units and values need to be checked for future use. |
| 5 | For the combination of CONCEPT_ID 3013466 (APTT IN BLOOD BY COAGULATION ASSAY) and UNIT_CONCEPT_ID 8555 (SECOND), the number and percent of records that have a value less than 1.80E+01. (Threshold=5% - Records=51.14%). | This measurement has not been used in any OMOP-SIDIAP project before. Units and values need to be checked for future use. |
| 6 | For the combination of CONCEPT_ID 3034426 (PROTHROMBIN TIME (PT)) and UNIT_CONCEPT_ID 8554 (PERCENT), the number and percent of records that have a value higher than 1.000000E+02. (Threshold=5% - Records=20.08%). | This measurement has not been used in any OMOP-SIDIAP project before. Units and values need to be checked for future use. |
| 7 | The number and percent of records with a value of 0 in the standard concept field OBSERVATION_CONCEPT_ID in the OBSERVATION table. (Threshold=5% - Records=19.80%). | Observation records with observation_concept_id=0 are local observations with no standard equivalent. |
| 8 | For the combination of CONCEPT_ID 3020460 (C REACTIVE PROTEIN [MASS/VOLUME] IN SERUM OR PLASMA) and UNIT_CONCEPT_ID 8751 (MILLIGRAM PER LITER), the number and percent of records that have a value higher than 2.400000E+01. (Threshold=5% -Records=15.52%). | This measurement has not been used in any OMOP-SIDIAP project before. Units and values need to be checked for future use. |
| 9 | For a CONCEPT_ID 193437 (NEOPLASM OF UNCERTAIN BEHAVIOR OF FEMALE GENITAL ORGAN), the number and percent of records associated with patients with an implausible gender (correct gender = FEMALE). (Threshold=5% - Records=14.95%). | The percentage of implausible gender is the same as in source data, so this was not an issue related to the mapping of this information and has to be revised at the source tables. |
| 10 | For a CONCEPT_ID 434251 (INJURY OF MALE EXTERNAL GENITAL ORGANS), the number and percent of records associated with patients with an implausible gender (correct gender = MALE). (Threshold=5% - Records=13.95%). | The percentage of implausible gender is the same as in source data, so this was not an issue related to the mapping of this information and has to be revised at the source tables. |
| 11 | For a CONCEPT_ID 201909 (FEMALE INFERTILITY), the number and percent of records associated with patients with an implausible gender (correct gender = FEMALE). (Threshold=5% - Records=13.45%). | The percentage of implausible gender is the same as in source data, so this was not an issue related to the mapping of this information and has to be revised at the source tables. |
| 12 | For a CONCEPT_ID 4199600 (CANDIDAL BALANITIS), the number and percent of records associated with patients with an implausible gender (correct gender = MALE). (Threshold=5% - Records=13.37%). | The percentage of implausible gender is the same as in source data, so this was not an issue related to the mapping of this information and has to be revised at the source tables. |
| 13 | For a CONCEPT_ID 4071874 (PAIN IN SCROTUM), the number and percent of records associated with patients with an implausible gender (correct gender = MALE). (Threshold=5% - Records=12.68%). | The percentage of implausible gender is the same as in source data, so this was not an issue related to the mapping of this information and has to be revised at the source tables. |
| 14 | For the combination of CONCEPT_ID 3010084 (C PEPTIDE [MASS/VOLUME] IN SERUM OR PLASMA) and UNIT_CONCEPT_ID 8842 (NANOGRAM PER MILLILITER), the number and percent of records that have a value less than 0.00E+00. (Threshold=5% - Records=12.17%). | This measurement has not been used in any OMOP-SIDIAP project before. Units and values need to be checked for future use. |
| 15 | The number and percent of distinct source values in the CONDITION_SOURCE_VALUE field of the CONDITION_OCCURRENCE table mapped to 0. (Threshold=10% - Records=11.61%). | The percentage of distinct source values not mapped is 11.61%, but the percentage of condition records mapped to a condition_concept_id=0 is less than 1%. To be improved, but the impact is minimum. |
| 16 | For the combination of CONCEPT_ID 3038553 (BODY MASS INDEX (BMI) [RATIO]) and UNIT_CONCEPT_ID 9531 (KILOGRAM PER SQUARE METER), the number and percent of records that have a value less than 1.60E+01. (Threshold=5% - Records=11.24%). | This measurement has not been used in any OMOP-SIDIAP project before. Units and values need to be checked for future use. |
| 17 | For the combination of CONCEPT_ID 3012516 (ALBUMIN [MASS/VOLUME] IN URINE) and UNIT_CONCEPT_ID 8751 (MILLIGRAM PER LITER), the number and percent of records that have a value less than 0.00E+00. (Threshold=5% - Records=10.81%). | This measurement has not been used in any OMOP-SIDIAP project before. Units and values need to be checked for future use. |
| 18 | For a CONCEPT_ID 4270932 (PAIN IN TESTICLE), the number and percent of records associated with patients with an implausible gender (correct gender = MALE). (Threshold=5% - Records=10.80%). | The percentage of implausible gender is the same as in source data, so this was not an issue related to the mapping of this information and has to be revised at the source tables. |
| 19 | For a CONCEPT_ID 193261 (VAGINOSPASM), the number and percent of records associated with patients with an implausible gender (correct gender = FEMALE). (Threshold=5% - Records=10.06%). | The percentage of implausible gender is the same as in source data, so this was not an issue related to the mapping of this information and has to be revised at the source tables. |
| 20 | For a CONCEPT_ID 439871 (HEMOSPERMIA), the number and percent of records associated with patients with an implausible gender (correct gender = MALE). (Threshold=5% - Records=9.23%). | The percentage of implausible gender is the same as in source data, so this was not an issue related to the mapping of this information and has to be revised at the source tables. |
| 21 | For a CONCEPT_ID 4171915 (ORCHITIS), the number and percent of records associated with patients with an implausible gender (correct gender = MALE). (Threshold=5% - Records=9.15%). | The percentage of implausible gender is the same as in source data, so this was not an issue related to the mapping of this information and has to be revised at the source tables. |
| 22 | For a CONCEPT_ID 441068 (TORSION OF APPENDIX OF TESTIS), the number and percent of records associated with patients with an implausible gender (correct gender = MALE). (Threshold=5% - Records=8.72%). | The percentage of implausible gender is the same as in source data, so this was not an issue related to the mapping of this information and has to be revised at the source tables. |
| 23 | For the combination of CONCEPT_ID 3026910 (GAMMA GLUTAMYL TRANSFERASE [ENZYMATIC ACTIVITY/VOLUME] IN SERUM OR PLASMA) and UNIT_CONCEPT_ID 8645 (UNIT PER LITER), the number and percent of records that have a value higher than 8.000000E+01. (Threshold=5% - Records=8.63%). | This measurement has not been used in any OMOP-SIDIAP project before. Units and values need to be checked for future use. |
| 24 | For a CONCEPT_ID 4090039 (PENILE ARTERIAL INSUFFICIENCY), the number and percent of records associated with patients with an implausible gender (correct gender = MALE). (Threshold=5% - Records=8.06%). | The percentage of implausible gender is the same as in source data, so this was not an issue related to the mapping of this information and has to be revised at the source tables. |
| 25 | For a CONCEPT_ID 198197 (MALE INFERTILITY), the number and percent of records associated with patients with an implausible gender (correct gender = MALE). (Threshold=5% - Records=7.72%). | The percentage of implausible gender is the same as in source data, so this was not an issue related to the mapping of this information and has to be revised at the source tables. |
| 26 | For the combination of CONCEPT_ID 3003785 (CARCINOEMBRYONIC AG [MASS/VOLUME] IN SERUM OR PLASMA) and UNIT_CONCEPT_ID 8748 (MICROGRAM PER LITER), the number and percent of records that have a value less than 0.00E+00. (Threshold=5% - Records=7.69%). | This measurement has not been used in any OMOP-SIDIAP project before. Units and values need to be checked for future use. |
| 27 | For a CONCEPT_ID 436466 (BALANOPOSTHITIS), the number and percent of records associated with patients with an implausible gender (correct gender = MALE). (Threshold=5% - Records=7.64%). | The percentage of implausible gender is the same as in source data, so this was not an issue related to the mapping of this information and has to be revised at the source tables. |
| 28 | For a CONCEPT_ID 435648 (RETRACTILE TESTIS), the number and percent of records associated with patients with an implausible gender (correct gender = MALE). (Threshold=5% - Records=7.17%). | The percentage of implausible gender is the same as in source data, so this was not an issue related to the mapping of this information and has to be revised at the source tables. |
| 29 | For a CONCEPT_ID 42709954 (PHIMOSIS), the number and percent of records associated with patients with an implausible gender (correct gender = MALE). (Threshold=5% - Records=6.14%). | The percentage of implausible gender is the same as in source data, so this was not an issue related to the mapping of this information and has to be revised at the source tables. |
| 30 | The number and percent of records that do not have a standard, valid concept in the UNIT_CONCEPT_ID field in the MEASUREMENT table. (Threshold=0% - Records=6.10%). | These measurement units are mapped to 9117 concept id. This concept has been deprecated and remapped to 720870. This concept must be remapped in the next ETL. No effect in the current studies. |
| 31 | For a CONCEPT_ID 4294393 (ULCER OF PENIS), the number and percent of records associated with patients with an implausible gender (correct gender = MALE). (Threshold=5% - Records=5.84%). | The percentage of implausible gender is the same as in source data, so this was not an issue related to the mapping of this information and has to be revised at the source tables. |
| 32 | For the combination of CONCEPT_ID 3020630 (PROTEIN [MASS/VOLUME] IN SERUM OR PLASMA) and UNIT_CONCEPT_ID 8713 (GRAM PER DECILITER), the number and percent of records that have a value less than 6.00E+00. (Threshold=5% - Records=5.42%). | This measurement has not been used in any OMOP-SIDIAP project before. Units and values need to be checked for future use. |
| 33 | The number and percent of records with a value of 0 in the standard concept field DRUG_CONCEPT_ID in the DRUG_EXPOSURE table. (Threshold=5% - Records=5.32%). | The value is slightly over the threshold. To be improved in future versions. |
| 34 | For a CONCEPT_ID 26662 (TESTICULAR HYPOFUNCTION), the number and percent of records associated with patients with an implausible gender (correct gender = MALE). (Threshold=5% - Records=5.21%). | The percentage of implausible gender is the same as in source data, so this was not an issue related to the mapping of this information and has to be revised at the source tables. |
| 35 | The number and percent of records with a value in the DAYS_SUPPLY field of the DRUG_EXPOSURE table greater than 365. (Threshold=1% - Records=2.78%). | The DRUG_EXPOSURE data comes from the prescriptions table. The source data includes prescriptions for a period longer than one year. |
| 36 | The number and percent of records with a value of 0 in the standard concept field CONDITION_CONCEPT_ID in the CONDITION_ERA table. (Threshold=0% - Records=2.60%). | These records correspond to condition source values that do not match any code of the source vocabularies. |
| 37 | The number and percent of records with a value in the DRUG_ERA_END_DATE field of the DRUG_ERA table greater than DATEADD(DD,1,GETDATE()). (Threshold=1% - Records=1.97%). | The DRUG_EXPOSURE data comes from the prescription table. In this case, it is possible that the planned end of treatment date occurs after the last date of data availability. |
| 38 | The number and percent of records with a value in the QUANTITY field of the DRUG_EXPOSURE table greater than 1095. (Threshold=1% - Records=1.19%). | The DRUG_EXPOSURE data comes from the prescription table. The source data includes prescriptions for a period longer than one year. |
| 39 | If yes, the number and percent of records with a date value in the DRUG_EXPOSURE_END_DATE field of the DRUG_EXPOSURE table that occurs after death. (Threshold=1% - Records=1.13%). | The DRUG_EXPOSURE data comes from the prescription table. In this case, it is possible that the planned end of treatment date occurs after the date of death. This data should not be used for research purposes. |
| 40 | The number and percent of records that have a value in the CONDITION_CONCEPT_ID field in the CONDITION_ERA table that do not conform to the CONDITION domain. (Threshold=0% - Records=0.33%). | Some records mapped from ICD10 codes with the vocabularies end in the wrong domain. To be checked for future mappings |
| 41 | The number and percent of records that have a value in the CONDITION_CONCEPT_ID field in the CONDITION_OCCURRENCE table that do not conform to the CONDITION domain. (Threshold=0% - Records=0.30%). | Some records mapped from ICD10 codes with the vocabularies end in the wrong domain. To be checked for future mappings |
| 42 | A yes or no value indicating if OFFSET is present in the NOTE_NLP table as expected based on the specification. | No records in NOTE_NLP table since this information is not available in the source data. |
| 43 | A yes or no value indicating if REVENUE_CODE_SOURCE_VALUE is present in the COST table as expected based on the specification. | No records in COST table since this information is not available in the source data. |
| 44 | The number and percent of records with a NULL value in the REVENUE_CODE_SOURCE_VALUE of the COST. (Threshold=100%). | No records in COST table since this information is not available in the source data. |

## Supplementary Figure 1. Source tables to OMOP-CDM tables conversion diagram

##
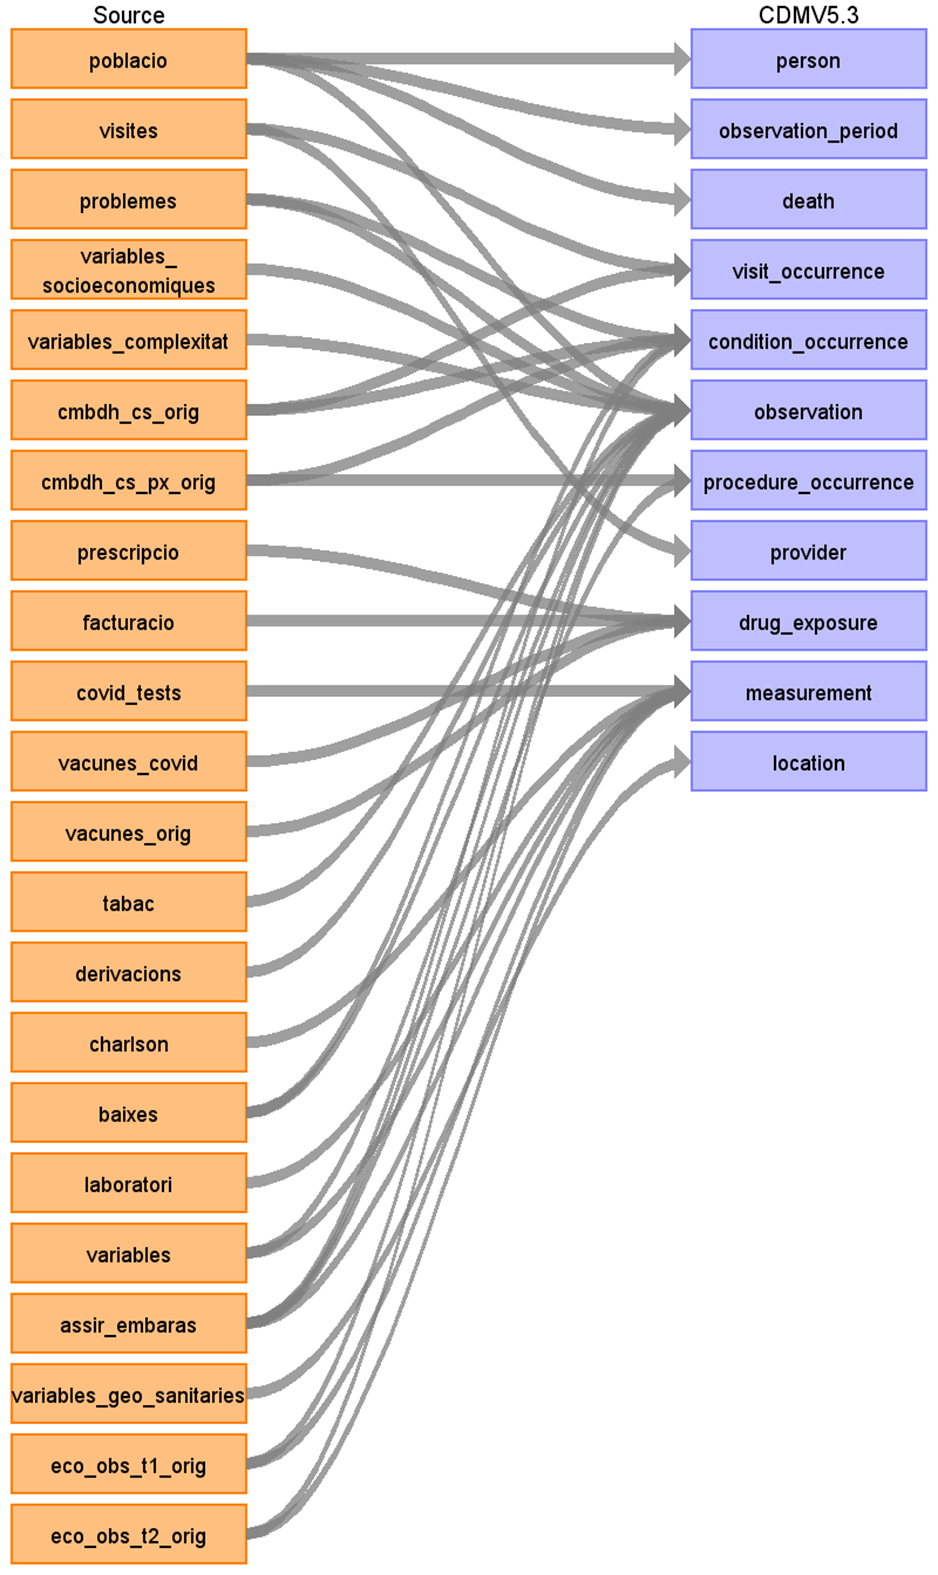


## Supplementary Figure 2. Extract, transform, and load (ETL) framework


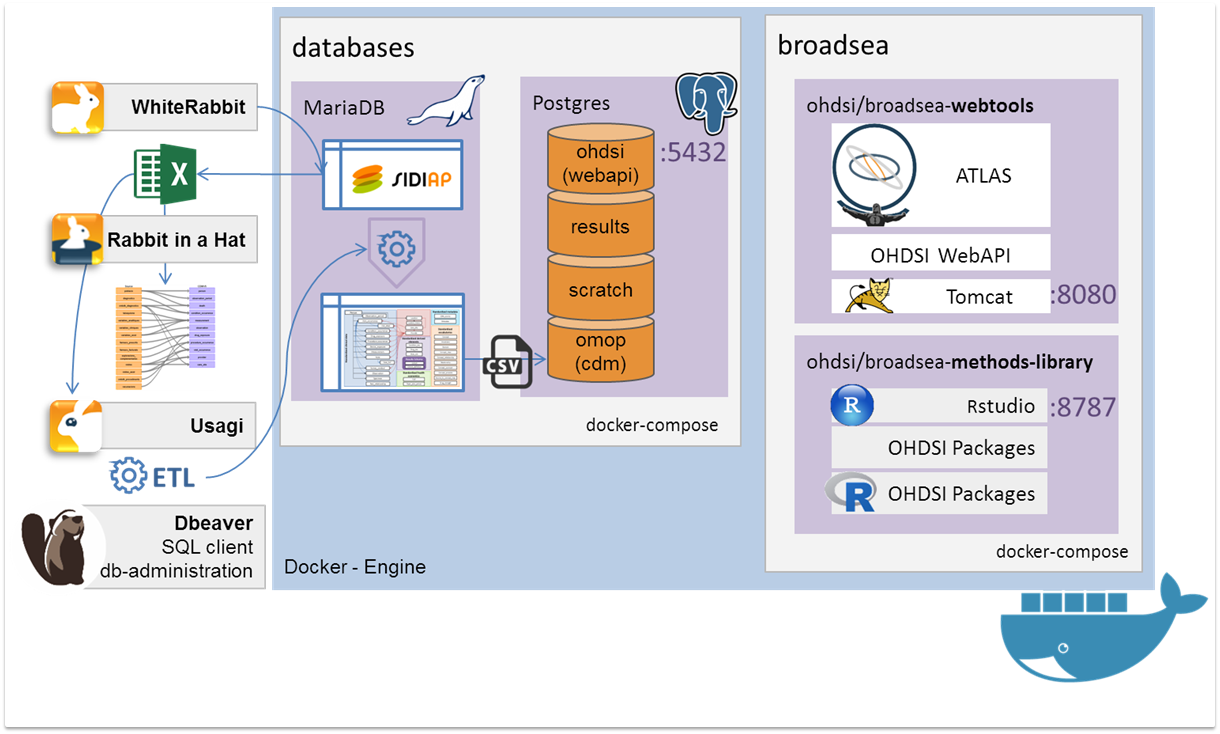


## Supplementary Figure 3. Symptoms recorded at time of outpatient COVID-19 diagnosis or positive test, stratified by age group


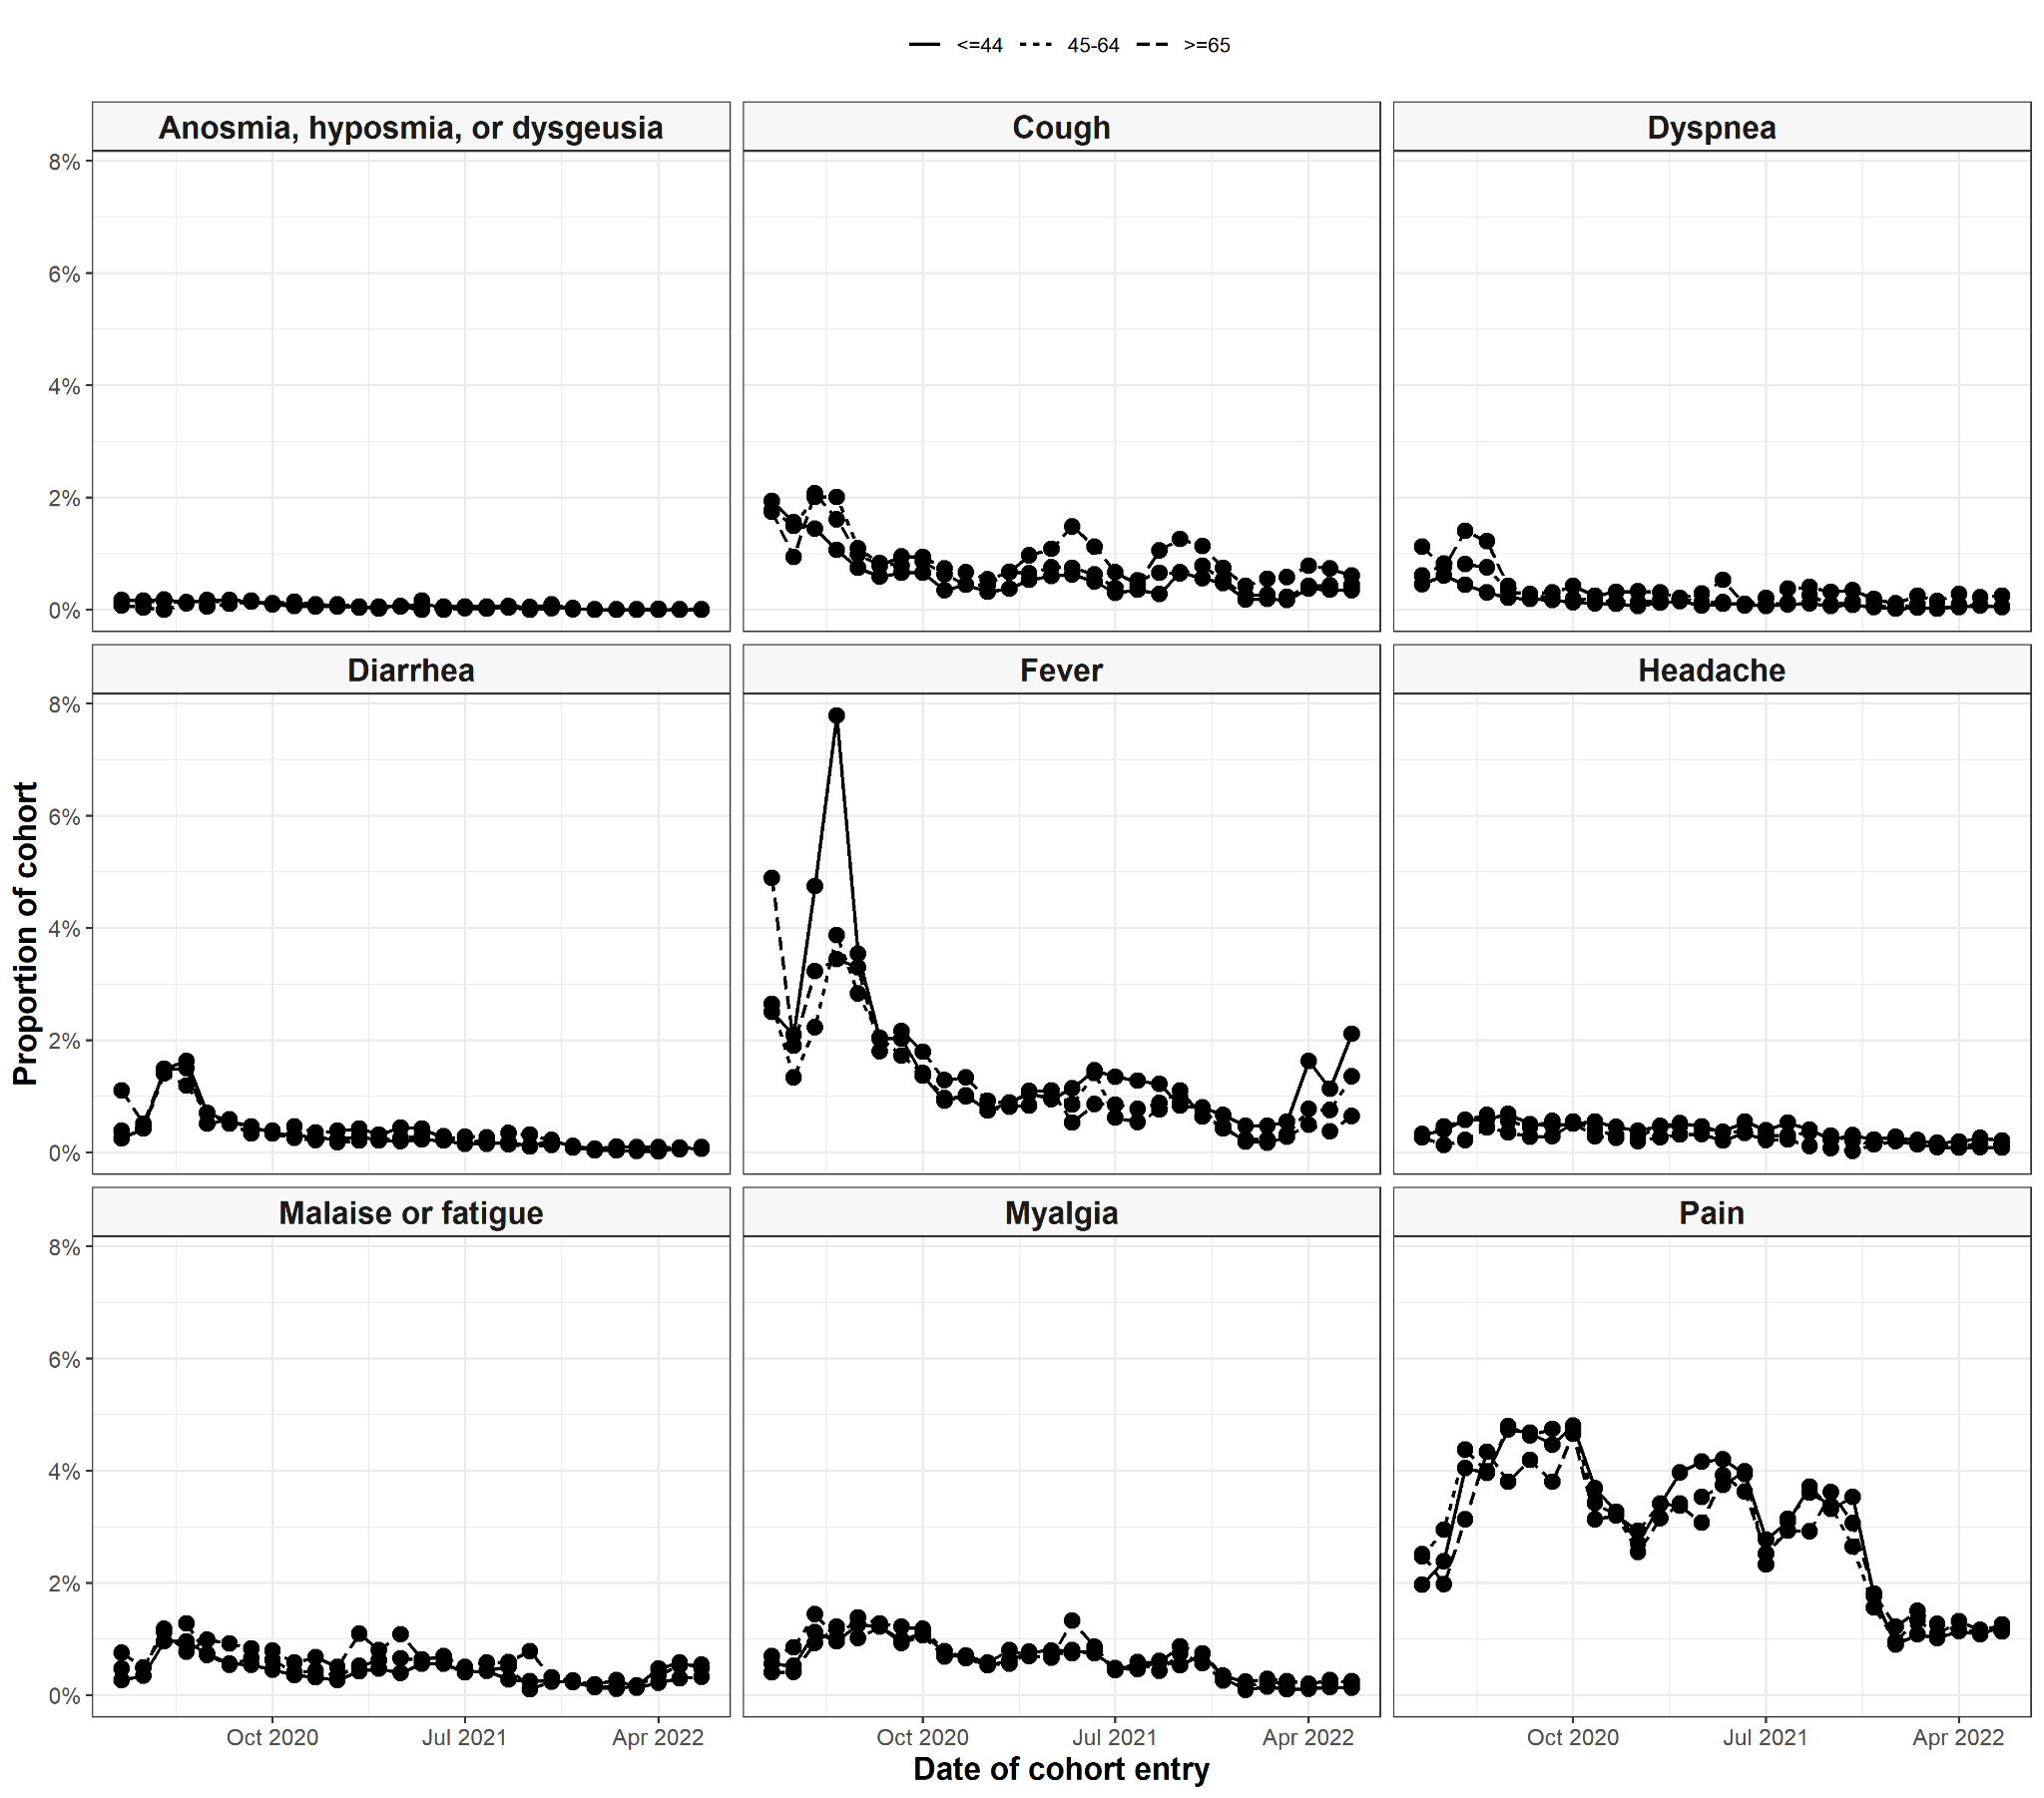


## Supplementary Figure 4. Symptoms recorded at time of outpatient COVID-19 diagnosis or positive test, stratified by sex

##
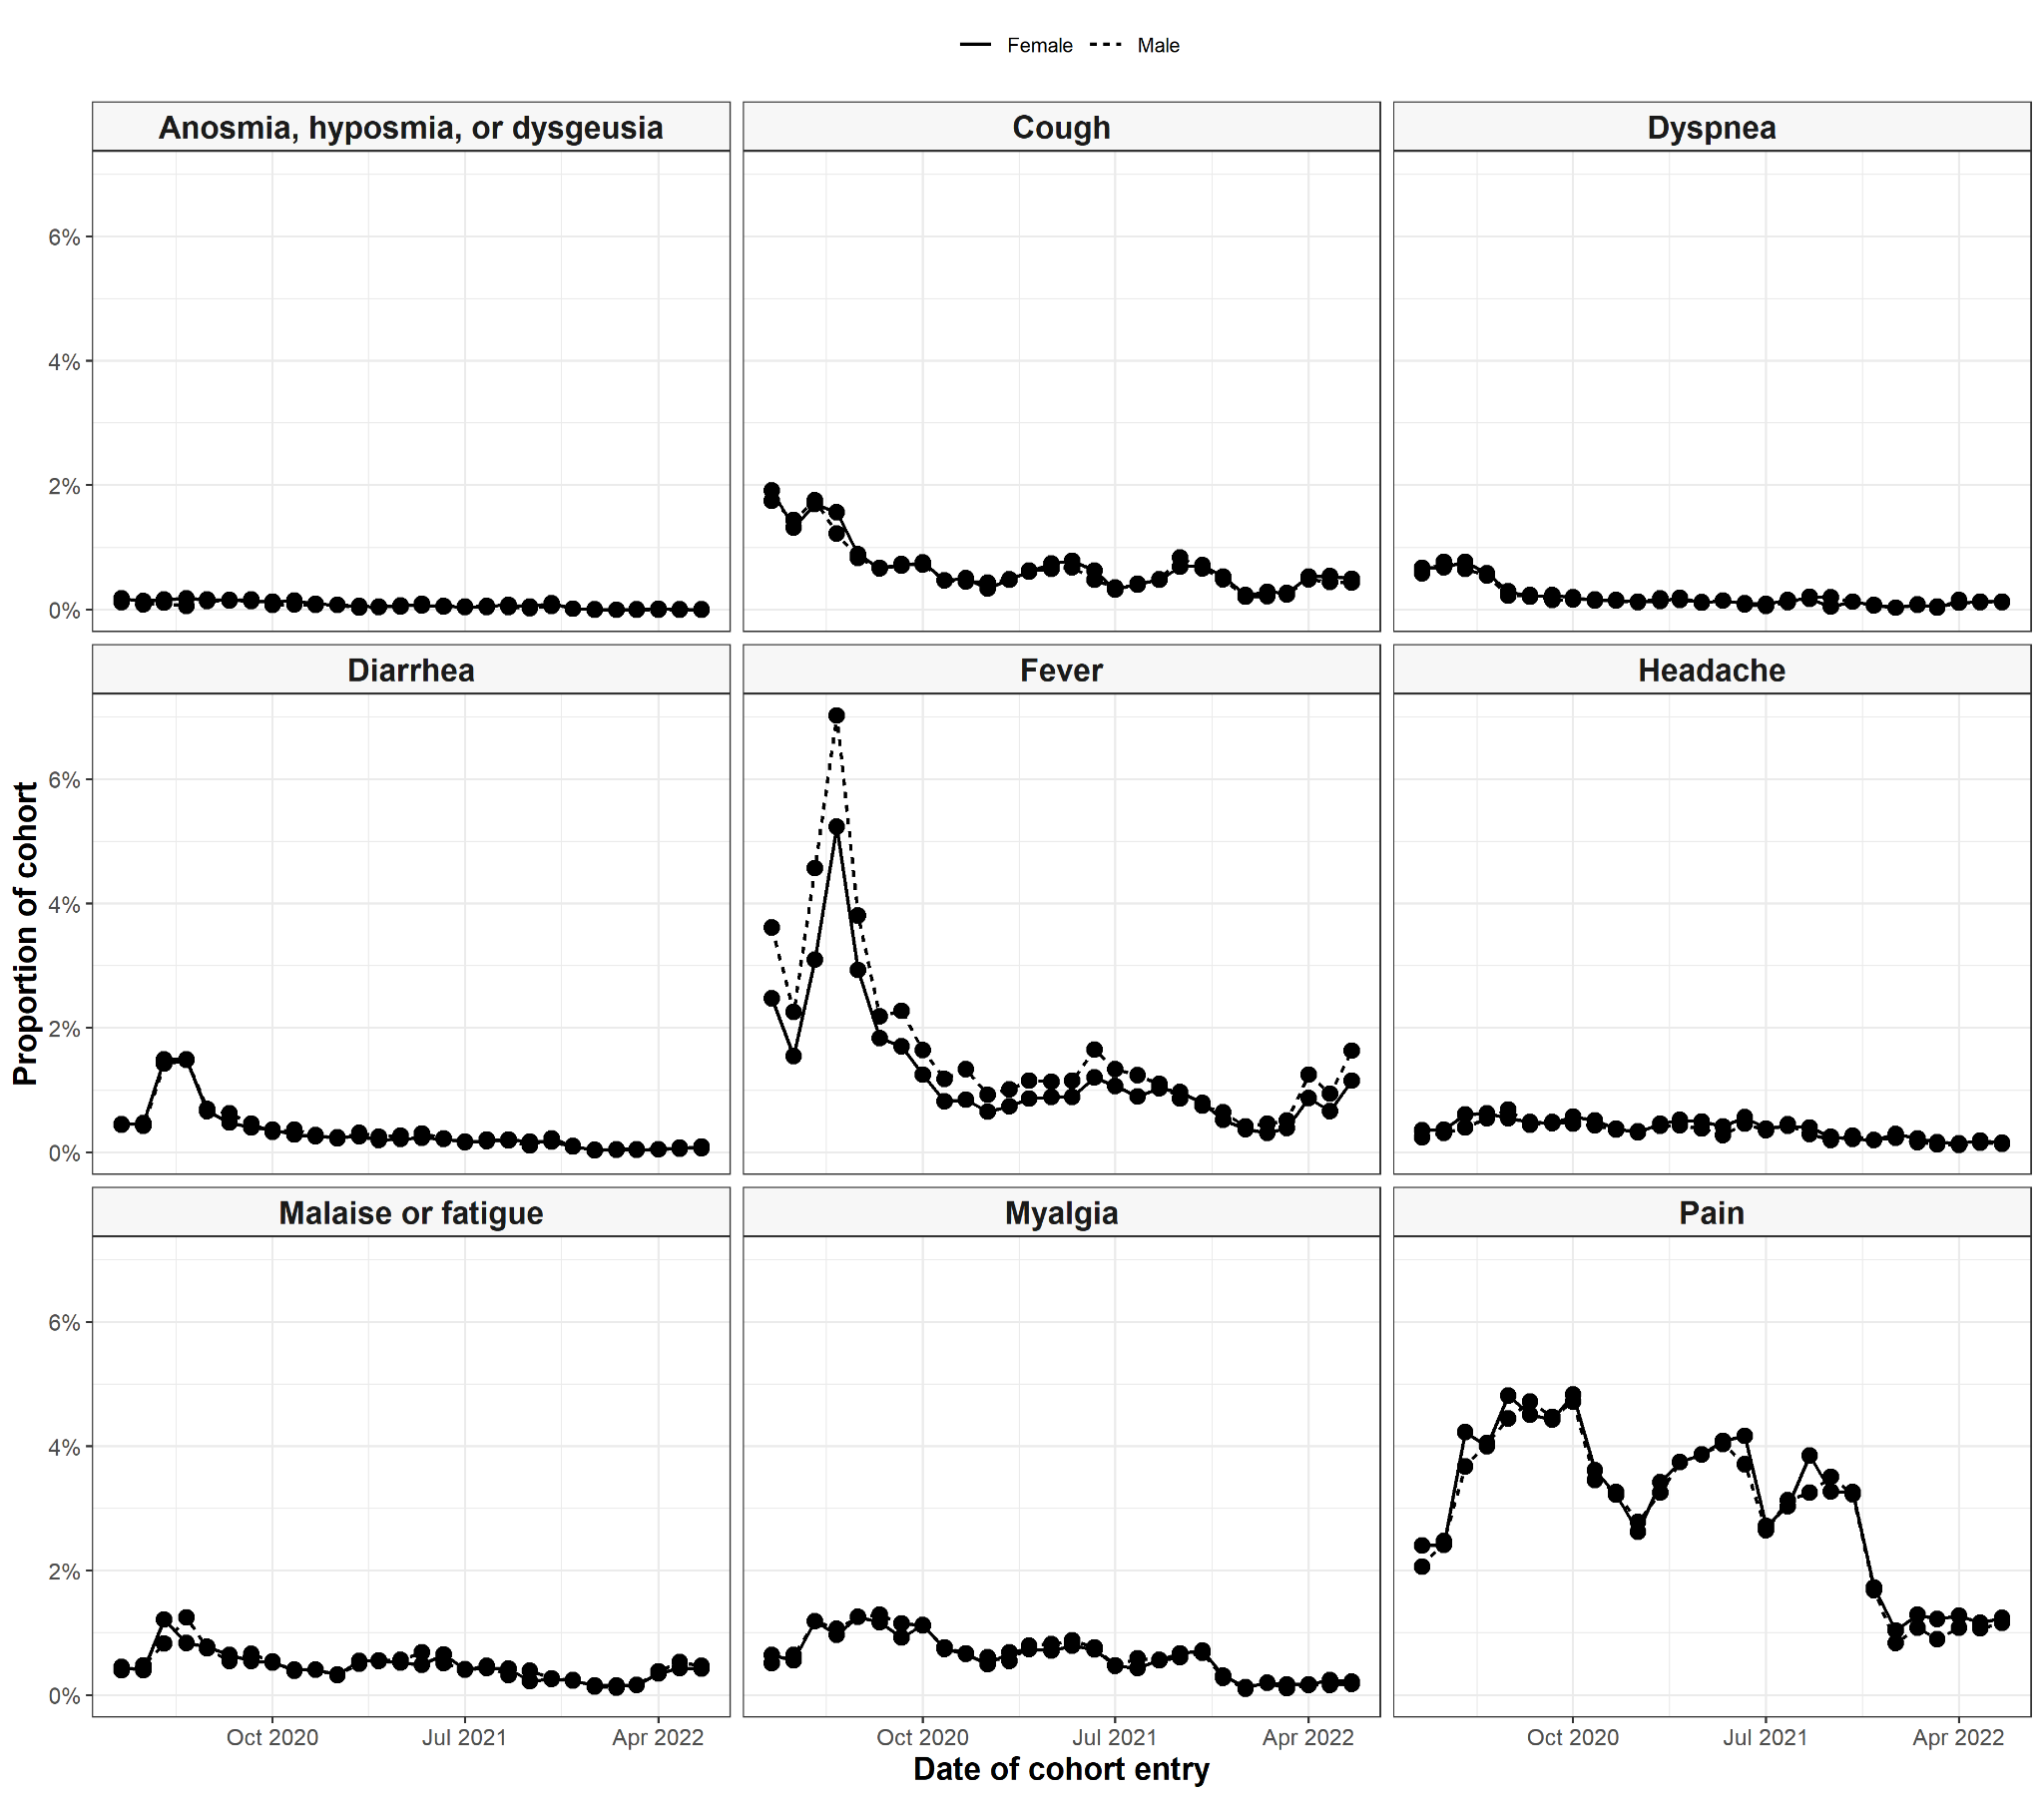


##

## Supplementary Figure 5. COVID-19 vaccination cohort entry over calendar time, stratified by age group


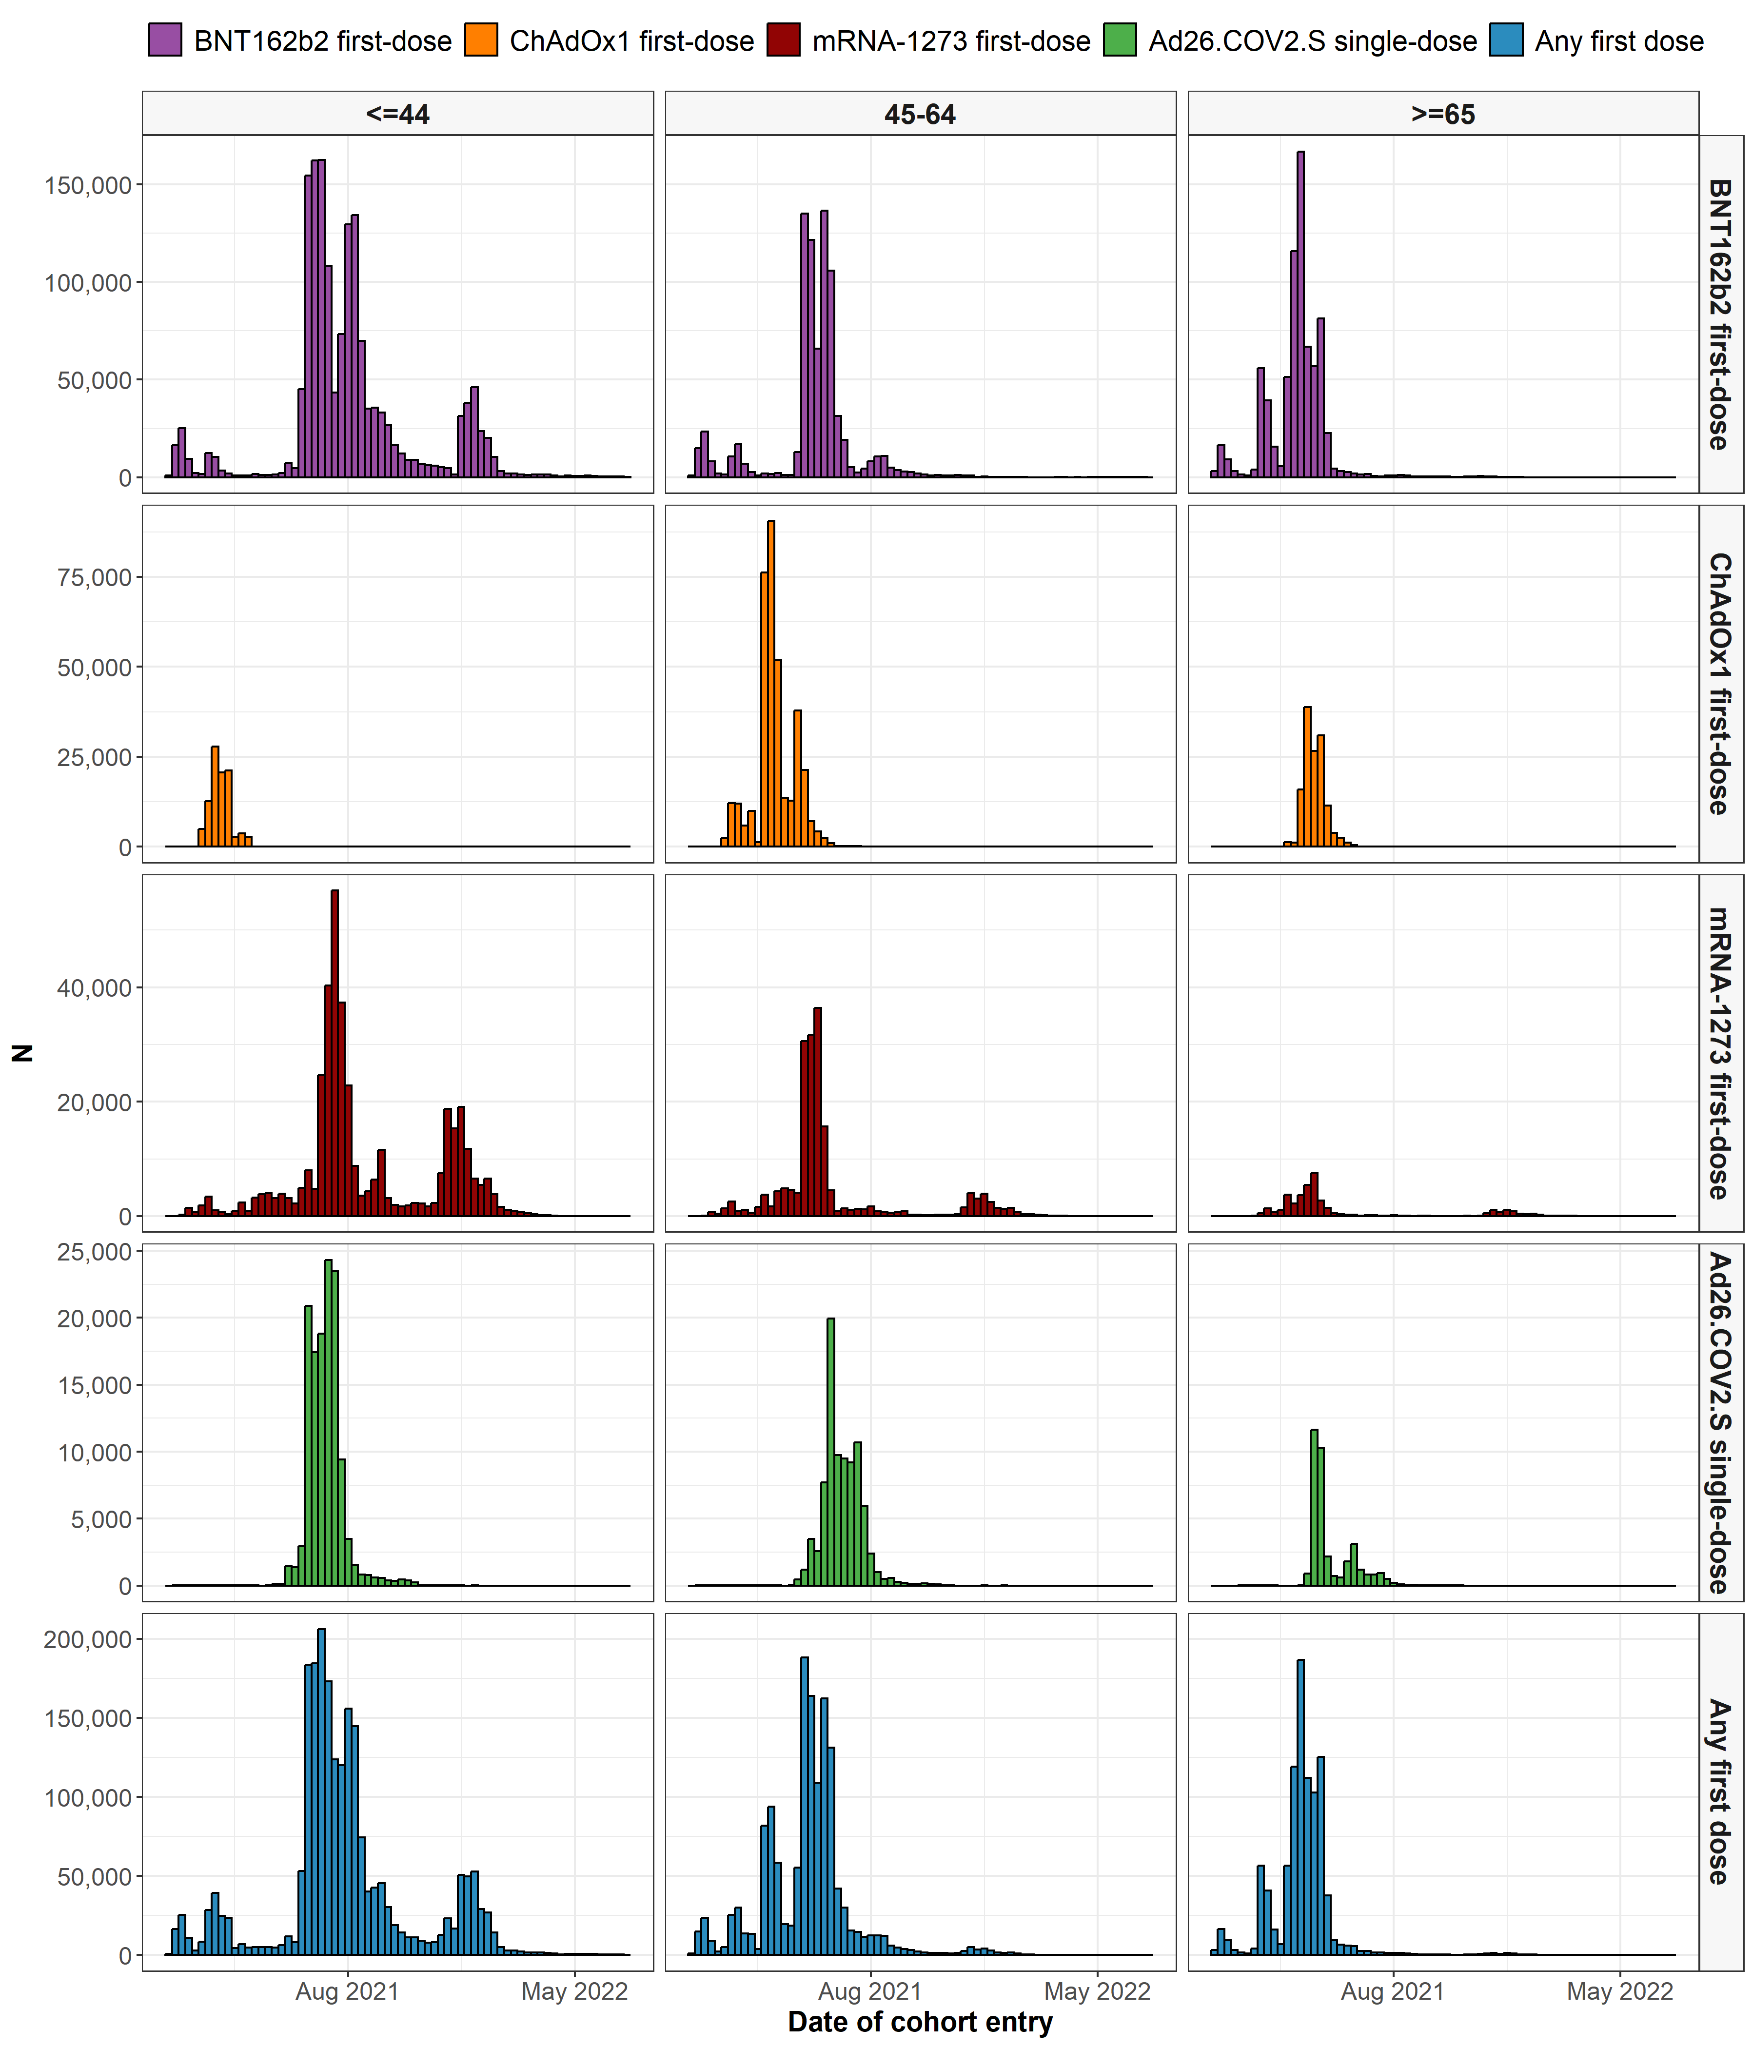

Supplement: Supplementary file 1 [file get_supplementary_file.php]
